# Supplementary material
Source: PubMed Central journal article supplement (PMC2911780)
Supplement: NIHMS217169-supplement-S1.pdf [file NIHMS217169-supplement-S1.pdf]

## 1 **Supplementary Material**

### 2 **Methods**

#### 3 *Microarray analysis*

4 Before microarray hybridization, the quality of the isolated RNA was assessed with an  
5 Agilent 2100 Bioanalyzer (Agilent Technologies, Palo Alto, USA). Double-stranded cDNA  
6 was synthesized from total RNA extracted from whole mouse lungs using the SuperScript  
7 Choice kit (Invitrogen, Paisly, UK) with a T7- (dT) 24 primer incorporating a T7 RNA  
8 polymerase promoter (Metabion, Martinsried, Germany). cRNA was prepared and biotin  
9 labeled by *in vitro* transcription (Enzo Biochemical, New York, USA). Labeled RNA was  
10 fragmented by incubation at 94°C for 35 min in the presence of 40 mM Tris-OAc (pH 8.1),  
11 100 mM KOAc, and 30 mM MgOAc. Labeled and fragmented cRNA (15 µg) was hybridized  
12 for 16 h at 45°C to a MG-U74Av2 mouse genome array (Affymetrix, High Wycombe, UK).  
13 After hybridization, the gene chips were automatically washed and stained with streptavidin-  
14 phycoerythrin using a fluidics station. Probe arrays were scanned at 3-µm resolution using a  
15 Genechip Scanner with confocal optics made for Affymetrix by Agilent (Böblingen,  
16 Germany).

17 Each cRNA sample generated from one lung was hybridized on one MG-74Av2 array. In  
18 total, 8 lungs were analyzed, two treated mice vs. two controls in two different mouse strains  
19 (BALB/c and C57BL/6) respectively. Affymetrix's Microarray Suite software 5.0 (MAS5),  
20 MicroDB, and Data Mining Tool were used to scan and analyze the relative abundance of  
21 each gene based on the intensity of the signal from each probe set. Arrays were scaled by  
22 MAS5 to a target value of 150 (scaling factor range 0.33-0.96). The data generated from  
23 different mouse strains was analyzed separately. We excluded all genes with absent call  
24 ( $p > 0.06$ ) in all 4 samples from the initial groups. We obtained a list of 7815 probe sets  
25 (BALB/c) (62,6 % of genes present on the MG-74Av2 array) and a list of 7290 probe sets  
26 (C57BL/6) (58,4 % of genes present on the MG-74Av2 array) respectively.

27 Two arrays (treated vs. control) comparisons analysis were performed allowing a total of  
28 four comparisons ( $2 \times 2$  matrix). For each comparison analysis, MAS5 generates a "difference  
29 call" of no change, marginal increase/decrease, or increase/decrease, respectively. Only those  
30 genes which were found to be similarly regulated in all 4 comparisons were classified as  
31 differentially expressed genes. The MAS5 fold-change output of a comparison analysis is the  
32 signal log ratio (SLR), which is the fold change presented in log<sub>2</sub>. The SLR was converted to  
33 a standard; no logarithmic scale and the mean fold change of all 4 comparisons was  
34 calculated. Gene categorization was based on the NetAffx database  
35 (<http://www.affymetrix.com/>). The output from the microarray analysis was merged with the  
36 Unigene or GenBank descriptor and saved as an Excel data spreadsheet.

37

### 38 *Real time RT-PCR*

39 PCR amplification and analysis were achieved using an ABI PRISM 7700 (Perkin Elmer,  
40 Rodgau, Germany) and SDS software version 1.7. The reaction mixture consisted of 100 ng  
41 of total RNA isolated from treated and untreated mouse lung tissue (Invisorb RNA Kit II,  
42 Invitex, Germany), 0.5  $\mu$ M of each specific primer, 0.5  $\mu$ l RNAsin (40 U/ $\mu$ l, Promega,  
43 Mannheim, Germany), 0.5  $\mu$ l MMLV-H reverse transcriptase (200 U/ $\mu$ l, Promega), 1  $\mu$ l  
44 AmpliTaqGold<sup>®</sup> (5 U/ $\mu$ l, Applied Biosystems, Foster city, CA, USA), 5 $\mu$ l 10 X PCR buffer  
45 without MgCl<sub>2</sub> (containing 100 mM Tris-HCL pH 8.3, 500 mM KCL), 2  $\mu$ l MgCl<sub>2</sub> (25 mM,  
46 Applied Biosystems), 1  $\mu$ l dNTPmix (10 mM, Applied Biosystems), 0.5  $\mu$ l SYBRgreen (50  
47 X, Biozym, Germany) and 0.25  $\mu$ l Rox (150  $\mu$ M TIPMOLBIOL, Berlin, Germany) in a total  
48 volume of 50  $\mu$ l. All templates were amplified using the following protocol: RT-step was  
49 done at 48°C for 30 min, the polymerase (AmpliTaGold, Applied Biosystems) was activated  
50 and cDNA denatured by a preincubation for 10 min at 95°C; the template was amplified for  
51 40 cycles of denaturation for 15 s at 95°C, annealing of primers and extension at 60°C for 1  
52 min. Fluorescence data were acquired during each extension phase. To determine the presence

53 of contaminating genomic DNA, the reverse transcriptase was omitted as a negative control.  
 54 As an additional positive control, a primer-pair for  $\beta$ -actin was used to amplify actin under the  
 55 same conditions. Product identity was confirmed by electrophoresis on a 4% agarose gel  
 56 stained with ethidium bromide.

### 57 List of primers

| Gene           | Species | GenBank<br>Acc. No. | Forward primer<br>5'-3'    | Reverse primer<br>5'-3'     | Amplicon<br>size (bp) |
|----------------|---------|---------------------|----------------------------|-----------------------------|-----------------------|
| <i>Gpx2</i>    | Mouse   | X91864              | CCAAGTCGTTCTA<br>CGATCTC   | CACATTCTCAATC<br>AGCACAG    | 95                    |
| <i>GSTO</i>    | Mouse   | AI843119            | TAATTTGACCTTC<br>TGGCCTA   | GAAAGTATGGGG<br>AAATCACA    | 212                   |
| $\beta$ -Actin | Mouse   | X03672              | GTTTGAGACCTTC<br>AACACCCCA | CTGGTCTCCGTAT<br>GT CCC TGT | 71                    |

58

### 59 *Protein preparation, SDS-PAGE and Western blotting*

60 One gram of mouse lung tissue (snap-frozen, stored at -80°C) was homogenized in 3 ml ice  
 61 cold 1 x PBS, pH 7.4, 1% Nonidet P-40 (Fluka), 0.5% Na-Deoxycholate (Roth, Karlsruhe,  
 62 Germany), 0.1% SDS (Sigma-Aldrich,Germany); 10  $\mu$ g/ml phenylmethylsulfonyl fluoride  
 63 (Roth); 50 KIU/ ml aprotinin (Santa Cruz Biotech); 1mM/ml (activated) sodium  
 64 orthovanadate (Sigma-Aldrich,Germany). The supernatants were cleared twice by  
 65 centrifugation at 10000 x g for 15 minutes at 4°C. Proteins were separated by SDS-PAGE  
 66 (12% acrylamide gel) and transferred to a nitrocellulose membrane (Schleicher & Schuell,  
 67 Germany). After transfer , the membrane was blocked and incubated with primary antibodies  
 68 (both anti-*Gpx-2* or anti-GSTO 1-1 at 1:1000 dilution) overnight at 4°C, then washed and  
 69 incubated with HRP-conjugated secondary antibody (1:10000, Amersham Pharmacia Biotech,  
 70 Freiburg, Germany for 1h at RT. The blot was developed using a chemiluminescence

71 detection kit (ECL, Amersham Life Science, Little Chalfont, UK) according to the  
72 manufacturer's instructions.

73

74 **Data**

75 **Table Is: Kinetic of differential cell count in BAL fluid at 16h and 48h after last allergen**  
76 **challenge**

77

|                | 16h     | 16h | 48h     | 48h  |                                    |
|----------------|---------|-----|---------|------|------------------------------------|
|                | control | OVA | control | OVA  |                                    |
| <b>Celltyp</b> | 2.2     | 258 | 0.001   | 2.2  | x 10 <sup>3</sup> / ml neutrophils |
|                | n/d     | n/d | 0.1     | 50.4 | x 10 <sup>3</sup> / ml eosinophils |
|                | n/d     | n/d | 0.07    | 11.0 | x 10 <sup>3</sup> / ml lymphocytes |
|                | n/d     | n/d | 21.6    | 28.6 | x 10 <sup>3</sup> / ml macrophages |

78 (n/d: not detectible)

79

80 **Table IIs: List of up regulated genes after OVA challenge**

81

| 82  | Identifier | Gene Title                               | Gene symbol  | BALB/c<br>(fold-change) | C57BL/6<br>(fold-change) |
|-----|------------|------------------------------------------|--------------|-------------------------|--------------------------|
| 85  | EDL04793   | arginase 1, liver                        | Arg1         | 66,2 ± 15,8             | 13,4 ± 1,6               |
| 86  | BE200119   | small chemokine (C-C motif) ligand 11    | Ccl11        | 14,2 ± 6,5              | 2,8 ± 0,4                |
| 87  | BC145867   | chemokine (C-C motif) ligand 2           | Ccl2         | 9,9 ± 0,4               | 11,9 ± 1,9               |
| 88  | L04694     | chemokine (C-C motif) ligand 7           | Ccl7         | 39,4 ± 6,2              | 20,4 ± 7,6               |
| 89  | AAF22536   | chemokine (C-C motif) ligand 9           | Ccl9         | 3,5 ± 0,6               | 2,8 ± 0,2                |
| 90  | AAH39919   | cholesterol 25-hydroxylase               | Ch25h        | 3,8 ± 0,2               | 3,3 ± 0,5                |
| 91  | U56900     | chitinase 3-like 3                       | Chi3l3       | 4,8 ± 0,5               | 2,6 ± 0,4                |
| 92  | BC011134   | chitinase, acidic                        | Chia         | 35,8 ± 13,9             | 3,2 ± 0,1                |
| 93  | BC116319   | chloride channel calcium activated 3     | Clca3        | 65,8 ± 35,0             | 32,5 ± 1,1               |
| 94  | AAD15798   | Cytokine-responsive protein CR6          | CR6          | 4,0 ± 0,7               | 2,1 ± 0,1                |
| 95  | AK180750   | esterase D/formylglutathione hydrolase   | Esd          | 2,4 ± 0,1               | 2,5 ± 0,2                |
| 96  | AK170282   | coagulation factor X                     | F10          | 2,3 ± 0,4               | 2,3 ± 0,3                |
| 97  | BG087011   | glycine amidinotransferase               | Gatm         | 2,4 ± 0,2               | 2,7 ± 0,5                |
| 98  | BC010823   | <b>glutathione peroxidase 2</b>          | <b>Gpx2</b>  | 7,9 ± 2,9               | 2,6 ± 0,2                |
| 99  | BAE27469   | <b>glutathione S-transferase omega 1</b> | <b>Gsto1</b> | 4,0 ± 0,3               | 2,5 ± 0,2                |
| 100 | AK085689   | potassium inwardly-rectifying channel    | Kcnj15       | 180,3 ± 54,7            | 2,1 ± 0,3                |
| 101 | AAI32070   | lipocalin 2                              | Lcn2         | 9,8 ± 0,5               | 3,4 ± 0,3                |
| 102 | BAE42486   | matrix metalloproteinase 12              | Mmp12        | 4,2 ± 0,8               | 4,5 ± 1,1                |
| 103 | AAH61139   | regenerating islet-derived 3 gamma       | Reg3g        | 45,7 ± 15,7             | 2,6 ± 0,3                |
| 104 | AAH55885   | serum amyloid A 3                        | Saa3         | 10,9 ± 0,6              | 57,1 ± 6,9               |
| 105 | AAA40130   | serine peptidase inhibitor, member 3N    | Serpina3n    | 5,8 ± 0,6               | 3,3 ± 0,5                |
| 106 | AF208031   | solute carrier family 5, member 1        | Slc5a1       | 19,7 ± 17,4             | 2,7 ± 0,2                |
| 107 | CAM19105   | suppressor of cytokine signaling 3       | Socs3        | 2,3 ± 0,1               | 2,1 ± 0,3                |
| 108 | AK007633   | small proline-rich protein 2A            | Sprr2a       | 8,9 ± 1,8               | 2,5 ± 0,7                |

|     |          |                                         |       |           |           |
|-----|----------|-----------------------------------------|-------|-----------|-----------|
| 109 | AK007296 | sulfiredoxin 1 homolog                  | Srxn1 | 9.4 ± 3.0 | 2.1 ± 0.1 |
| 110 | BC008107 | tissue inhibitor of metalloproteinase 1 | Timp1 | 5.7 ± 1.2 | 2.5 ± 0.3 |
| 111 | BC004676 | upstream binding transcription factor   | Ubtf  | 5.3 ± 0.7 | 2.3 ± 0.1 |
| 112 |          |                                         |       |           |           |
| 113 |          |                                         |       |           |           |
